# Supplementary material
Source: PubMed Central journal article supplement (PMC9905053)

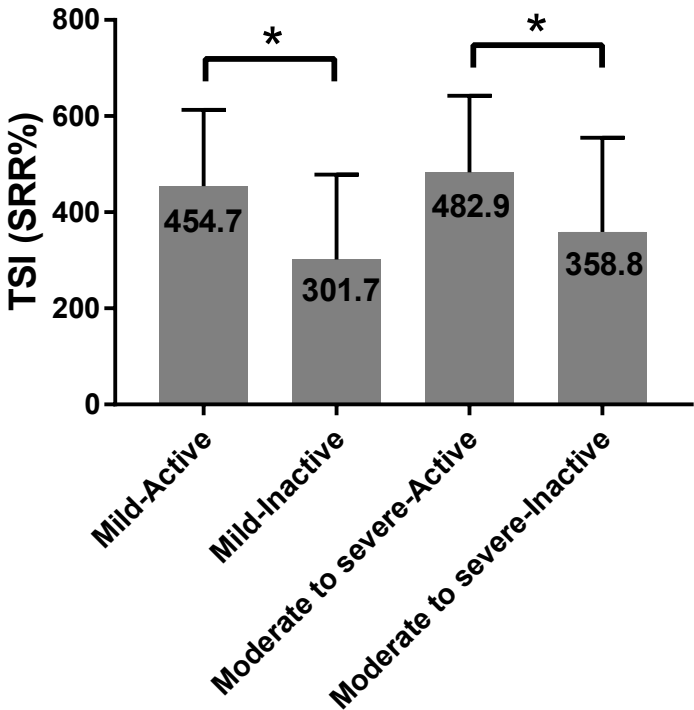

Supplement: 41433_2022_1981_MOESM4_ESM.pdf [file 41433_2022_1981_MOESM4_ESM.pdf]
